# Supplementary material for: Guide RNA structure design enables combinatorial CRISPRa programs for biosynthetic profiling
Source: PubMed Central journal article supplement — Nat Commun. 2024 Jul 27;15:6341. doi: 10.1038/s41467-024-50528-1 (PMC11283517; doi:10.1038/s41467-024-50528-1), 2024-07-27
Supplement: 41467_2024_50528_MOESM3_ESM.pdf [file 41467_2024_50528_MOESM3_ESM.pdf]

### **Description of Additional Supplementary Files**

File Name: Supplementary Data 1

Description: scRNA spacer sequences

File Name: Supplementary Data 2

Description: *E. coli* expression plasmids

Sequences of output plasmids plus the scRNA library plasmid are also provided as separate GenBank files.

File Name: Supplementary Data 3

Description: scRNA library truncation levels

File Name: Supplementary Data 4

Description: GenBank-formatted full sequences for select plasmids in this work, with annotations of genetic elements. All library-format output plasmids are included, as well as an example library plasmid.
